# Supplementary material for: Urine and Serum Metabolite Profiling of Rats Fed a High-Fat Diet and the Anti-Obesity Effects of Caffeine Consumption
Source: PubMed Central journal article supplement (PMC6272342; doi:10.3390/molecules20023107), 2015-02-13
Supplement: molecules-20-03107-s001.pdf [file molecules-20-03107-s001.pdf]

# Supplementary Information

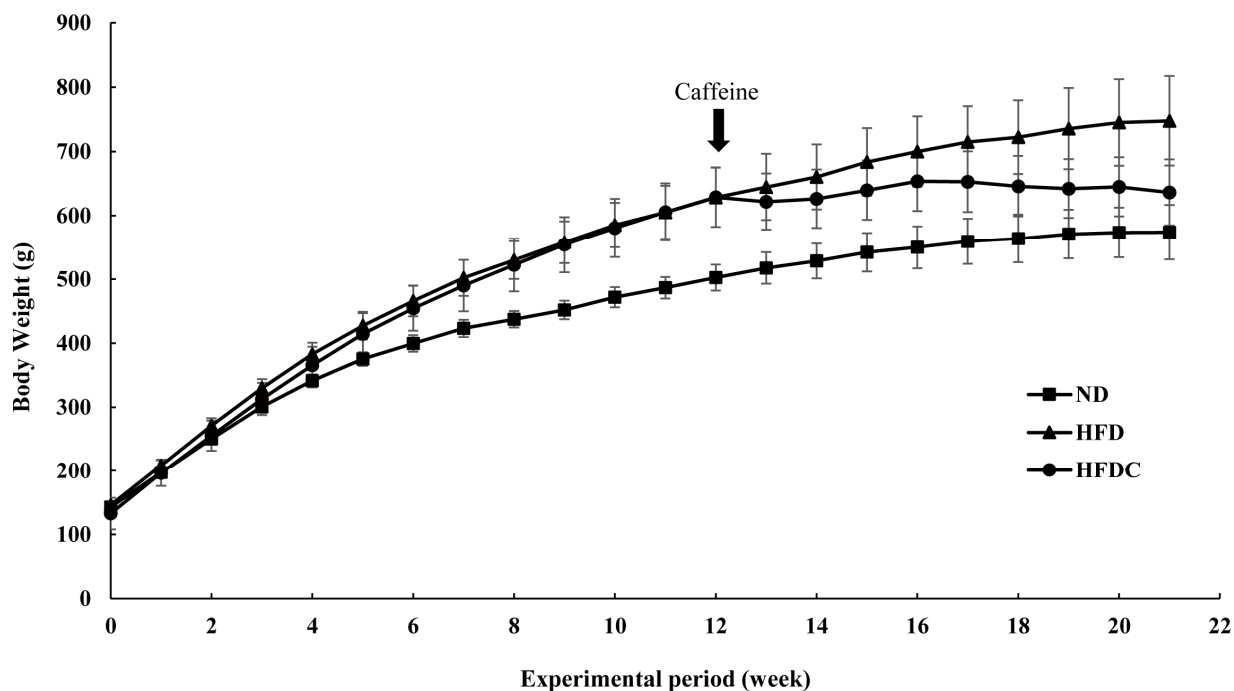

Figure S1. Effects of caffeine on body weight in rats fed a high-fat diet.

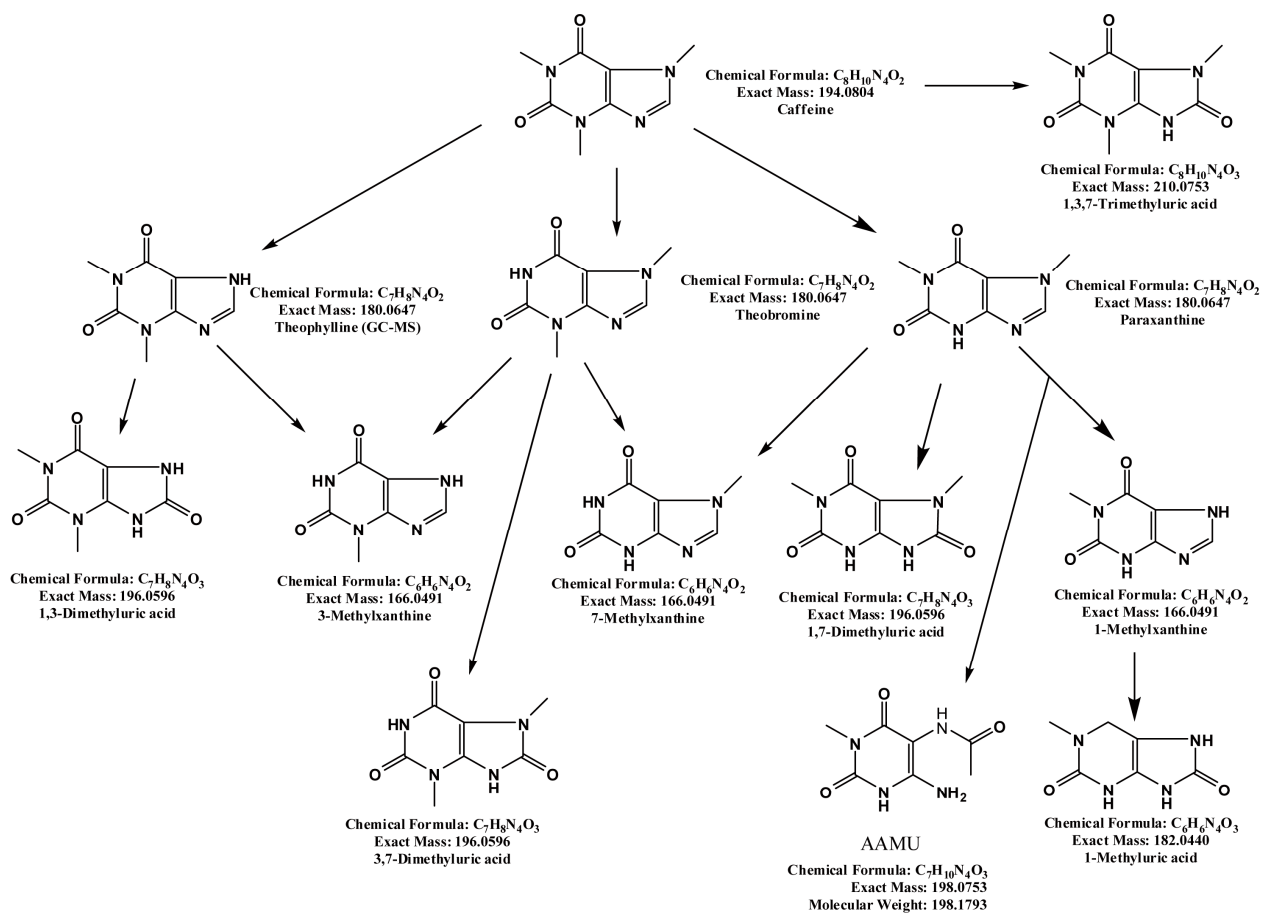

Figure S2. Metabolic pathway of caffeine and caffeine derivatives detected in this study.
